# Supplementary material for: A strategy to unlock the potential of CrN as a highly active oxygen reduction reaction catalyst
Source: Royal Society of Chemistry journal article supplement (doi:10.1039/c9ta14085a), 2020-01-01
Supplement: c9ta14085a1.pdf [file c9ta14085a1.pdf]

## *Supporting Information*

# **A strategy to unlock the potential of CrN as highly active oxygen reduction reaction catalyst**

Junming Luo<sup>a,b</sup>, Xiaochang Qiao<sup>d</sup>, Jutao Jin<sup>d</sup>, Xinlong Tian<sup>e</sup>, Hongbo Fan<sup>a,\*</sup>, Demei Yu<sup>b</sup>, Wenlong Wang<sup>d</sup>,  
Shijun Liao<sup>c,\*</sup>, Neng Yu<sup>f</sup> and Yijie Deng<sup>a,b</sup>

<sup>a</sup> School of Environment and Civil Engineering, Dongguan University of Technology, Dongguan 523808,  
People's Republic of China

<sup>b</sup> School of Science, Xi'an Jiaotong University, Xi'an 710049, People's Republic of China

<sup>c</sup> The Key Laboratory of Fuel Cell Technology of Guangdong Province & The Key Laboratory of New Energy  
Technology of Guangdong Universities, School of Chemistry and Chemical Engineering, South China  
University of Technology, Guangzhou 510641, People's Republic of China

<sup>d</sup> School of Materials Science and Engineering, Dongguan University of Technology, Dongguan 523808,  
People's Republic of China

<sup>e</sup> State Key Laboratory of Marine Resource Utilization in South China Sea, Hainan University, Haikou  
570228, People's Republic of China

<sup>f</sup> State Key Laboratory of Nuclear Resources and Environment, East China University of Technology,  
Nanchang 330013, People's Republic of China

\* Corresponding author, e-mail address: fhb666666@126.com, chsjliao@scut.edu.cn

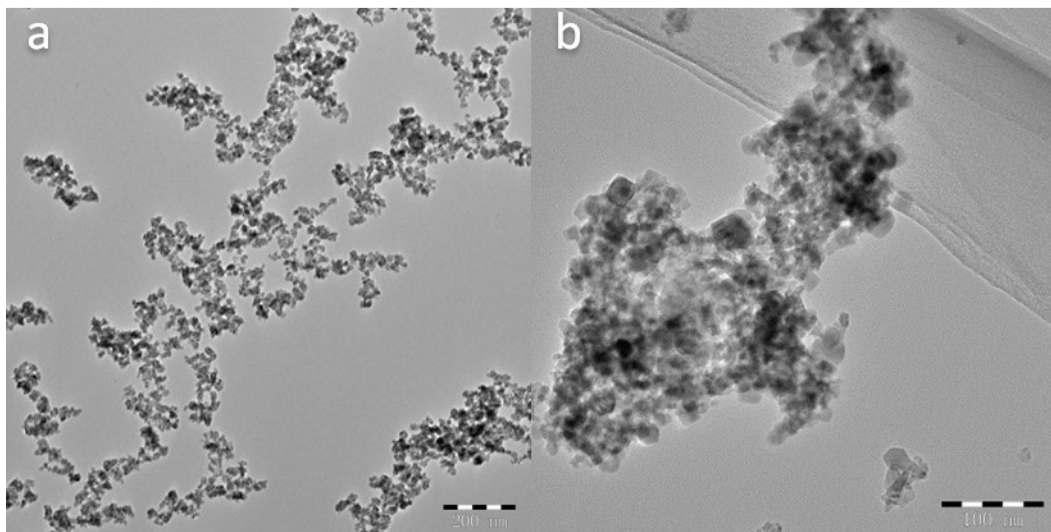

**Figure S1.** TEM images of free-standing CrN annealed at 750°C in NH<sub>3</sub> atmosphere for 2 h.

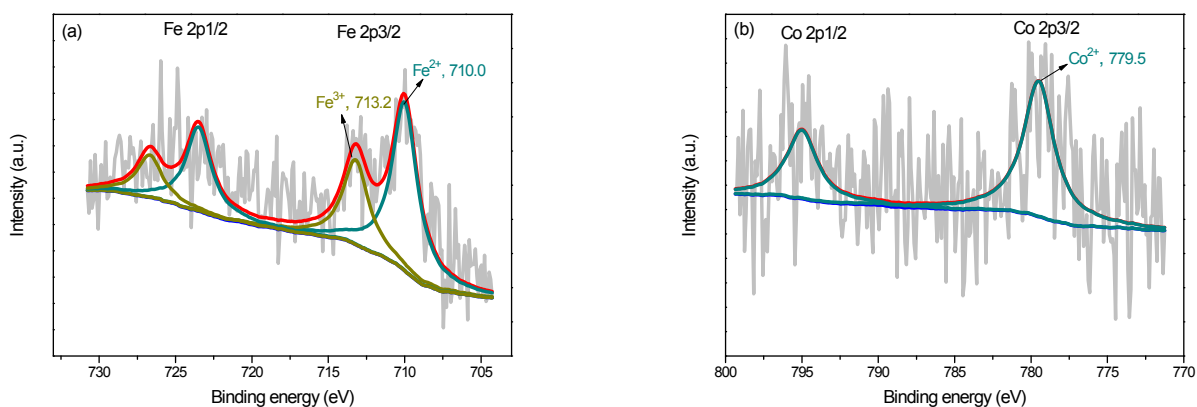

**Figure S2.** XPS spectra of (a) Fe 2p in Cr<sub>10</sub>Fe<sub>2</sub>/Z8C and (b) Co 2p in Cr<sub>10</sub>Co<sub>2</sub>/Z8C.

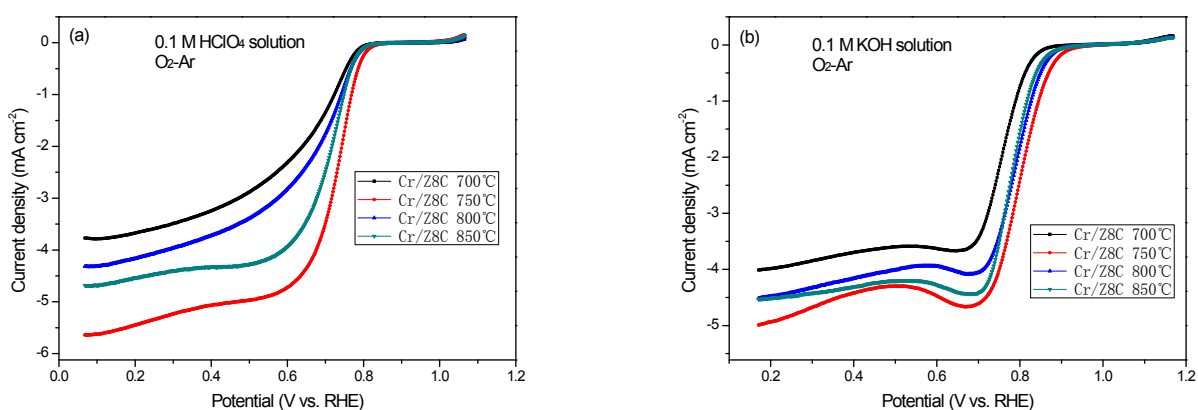

**Figure S3.** Linear sweep voltammetry curves of Cr/Z8C annealing at different temperatures (a) in 0.1 M HClO<sub>4</sub> solution and (b) 0.1 M KOH solution, calculated by subtracting Ar-saturated solution from O<sub>2</sub>-saturated solution at a rotation speed of 1600 rpm.

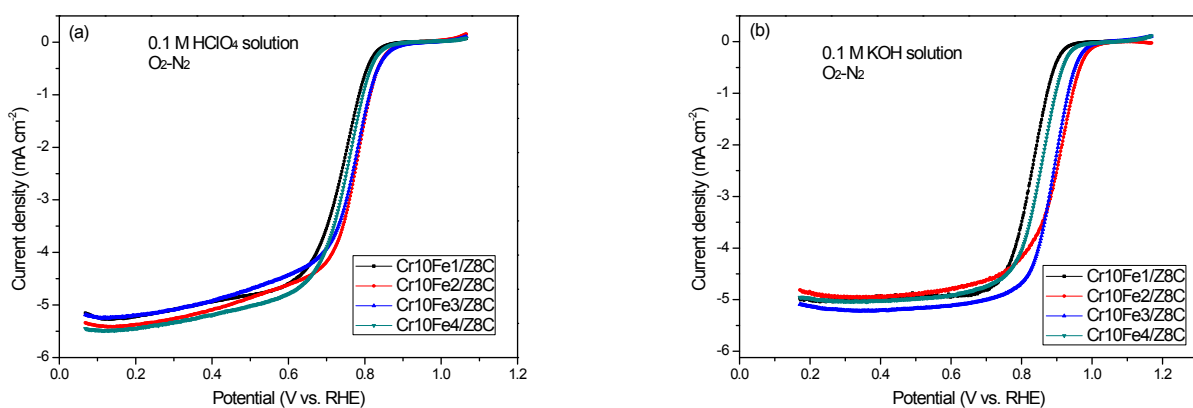

**Figure S4.** Linear sweep voltammetry curves of  $\text{Cr}_{10}\text{Fe}_x/\text{Z8C}$  annealing at  $750^\circ\text{C}$  (a) in 0.1 M  $\text{HClO}_4$  solution and (b) 0.1 M  $\text{KOH}$  solution, calculated by subtracting Ar-saturated solution from  $\text{O}_2$ -saturated solution at a rotation speed of 1600 rpm.

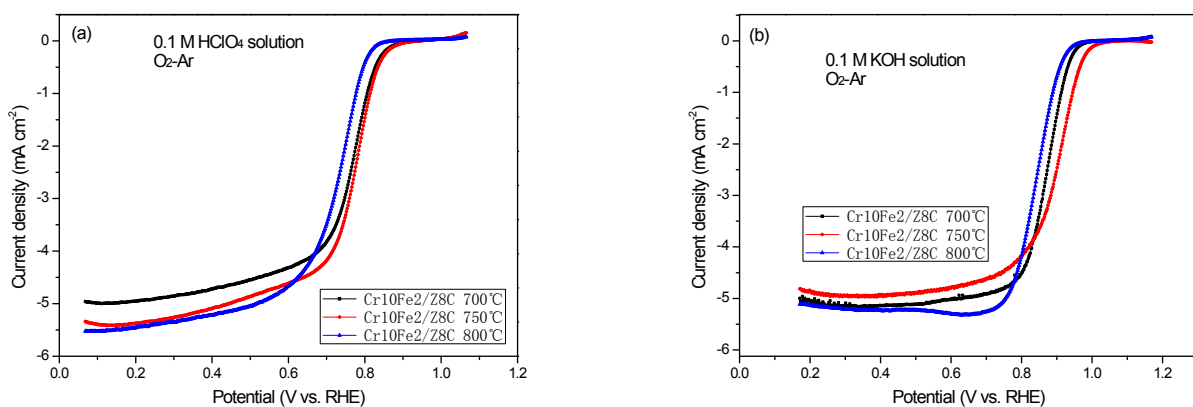

**Figure S5.** Linear sweep voltammetry curves of  $\text{Cr}_{10}\text{Fe}_2/\text{Z8C}$  annealing at different temperature (a) in 0.1 M  $\text{HClO}_4$  solution and (b) 0.1 M  $\text{KOH}$  solution, calculated by subtracting Ar-saturated solution from  $\text{O}_2$ -saturated solution at a rotation speed of 1600 rpm.

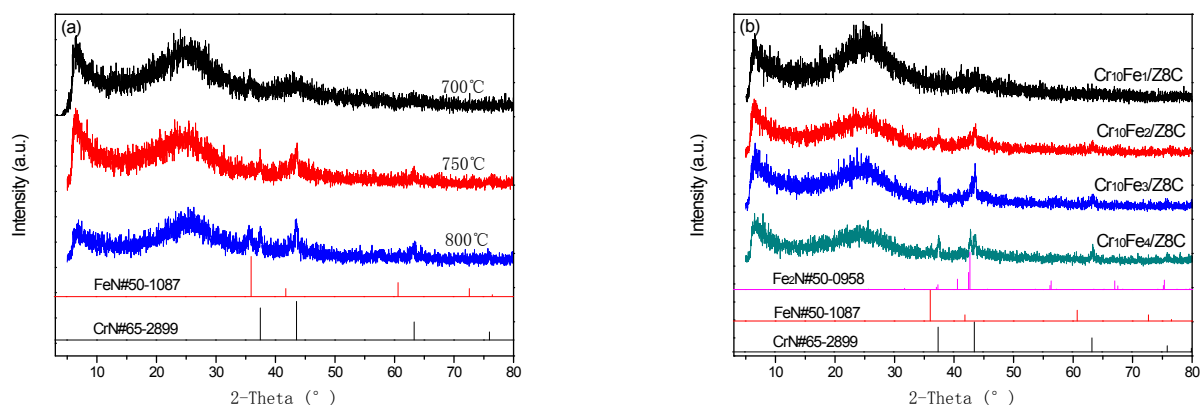

**Figure S6.** (a) XRD patterns of  $\text{Cr}_{10}\text{Fe}_2/\text{Z8C}$  annealed at different temperatures in an  $\text{NH}_3$  atmosphere for 2 h; (b) XRD patterns of  $\text{Cr}_{10}\text{Fe}_x/\text{Z8C}$  ( $x = 1, 2, 3, 4$ ) annealed at  $750^\circ\text{C}$  in an  $\text{NH}_3$  atmosphere for 2 h.

Figure S6a shows that clear diffraction peaks of CrN can only be found in the patterns of  $\text{Cr}_{10}\text{Fe}_2/\text{Z8C}$

annealed at 750 and 800°C, while the FeN phase can be found in the patterns of Cr<sub>10</sub>Fe<sub>2</sub>/Z8C annealed at 700 and 800°C. This is probably because that Fe could be fully doped in the lattice of CrN at 750°C, as the annealing temperature rises, the doping capacity decreases therefore the FeN phase appeared again. As shown in Figure S6b, the Cr/Fe molar ratio higher than 10:2 resulted in the formation of FeN and Fe<sub>2</sub>N, which is very likely that the amount of Fe surpassed the doping capacity therefore the excess Fe appeared as FeN and Fe<sub>2</sub>N. In addition, it can be seen that the Cr/Fe molar ratio lower than 10:2 resulted in no clear diffraction peaks of CrN. This is probably that the amount of Fe was too low to destroy the structure of ZIF-8 to form detectable CrN crystals.

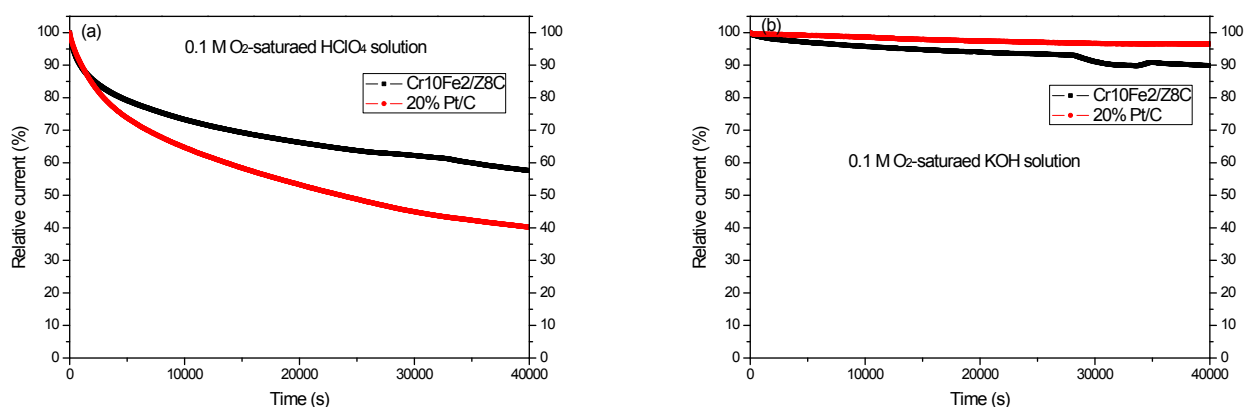

**Figure S7.** Catalytic stability of Cr<sub>10</sub>Fe<sub>2</sub>/Z8C and Pt/C polarized at 0.7 V vs. RHE during 40,000 s in (a) 0.1 M O<sub>2</sub>-saturated HClO<sub>4</sub> solution and (b) 0.1 M O<sub>2</sub>-saturated KOH solution.

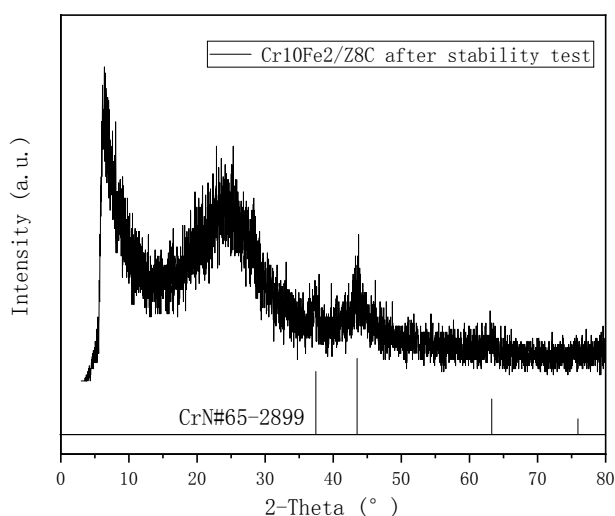

**Figure S8.** XRD pattern of Cr<sub>10</sub>Fe<sub>2</sub>/Z8C after stability tests.

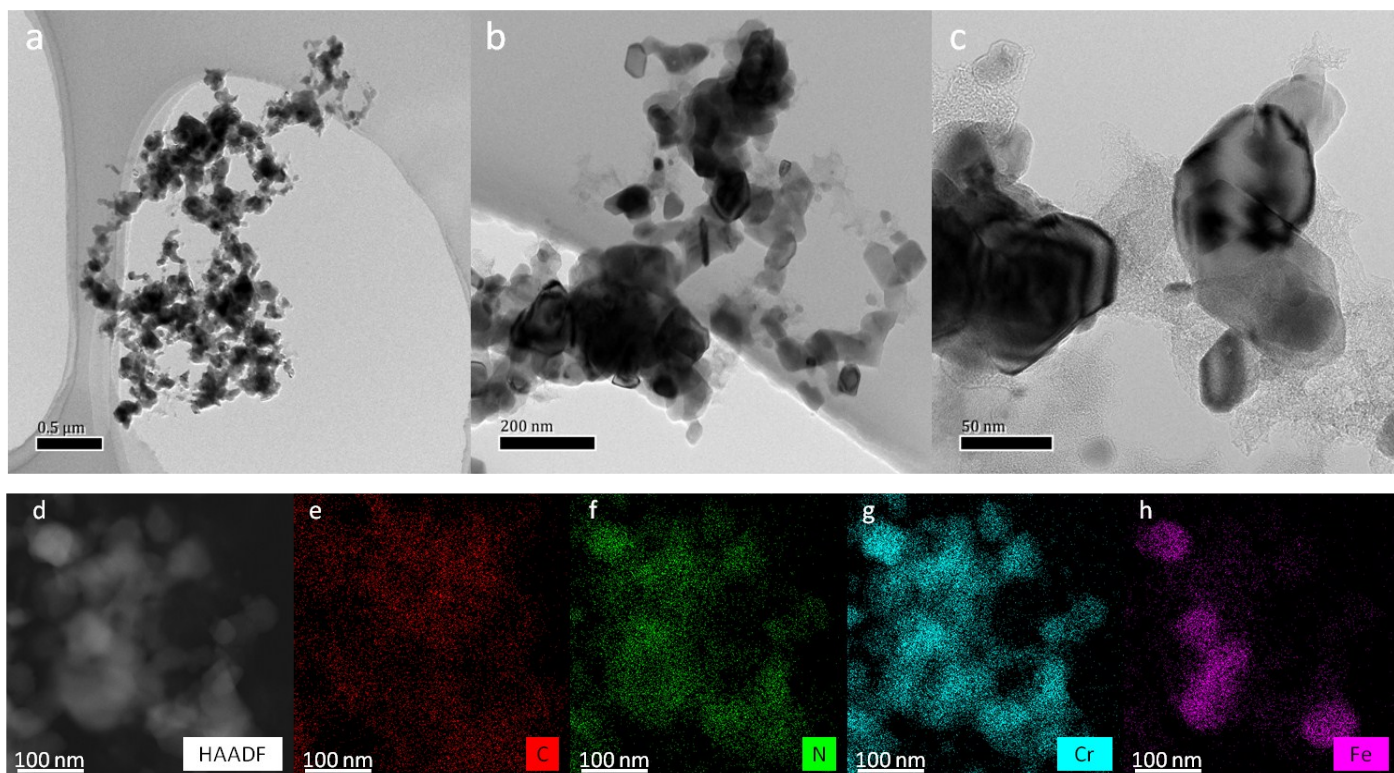

**Figure S9.** TEM images (a-c), HAADF images and EDS elemental mappings (d-h) of  $\text{Cr}_{10}\text{Fe}_2/\text{Z8C}$  after stability tests.

**Table S1.** Atomic contents of  $\text{Cr}/\text{Z8C}$ ,  $\text{Cr}_{10}\text{Fe}_2/\text{Z8C}$ ,  $\text{Cr}_{10}\text{Co}_2/\text{Z8C}$  in EDX analysis.

| Sample                                 | Atomic contents (%) |       |      |     |     |       |       |
|----------------------------------------|---------------------|-------|------|-----|-----|-------|-------|
|                                        | C                   | N     | Cr   | Fe  | Co  | Cr/Fe | Cr/Co |
| $\text{Cr}/\text{Z8C}$                 | 86.71               | 12.74 | 0.55 | -   | -   | -     | -     |
| $\text{Cr}_{10}\text{Fe}_2/\text{Z8C}$ | 97.33               | 2.39  | 0.16 | 0.1 | -   | 1.6   | -     |
| $\text{Cr}_{10}\text{Co}_2/\text{Z8C}$ | 97.13               | 2.64  | 0.11 | -   | 0.1 | -     | 1.1   |

**Table S2.** Atomic contents of  $\text{Cr}/\text{Z8C}$ ,  $\text{Cr}_{10}\text{Fe}_2/\text{Z8C}$ ,  $\text{Cr}_{10}\text{Co}_2/\text{Z8C}$  and  $\text{N-Z8C}$  in XPS analysis.

| Sample                                 | Atomic contents (%) |       |      |      |      |      |      |
|----------------------------------------|---------------------|-------|------|------|------|------|------|
|                                        | C                   | N     | O    | Cr   | Zn   | Fe   | Co   |
| $\text{Cr}/\text{Z8C}$                 | 79.24               | 10.23 | 8.37 | 1.37 | 0.78 | -    | -    |
| $\text{Cr}_{10}\text{Fe}_2/\text{Z8C}$ | 89.24               | 4.99  | 5.04 | 0.41 | 0.15 | 0.16 | -    |
| $\text{Cr}_{10}\text{Co}_2/\text{Z8C}$ | 89.22               | 3.71  | 6.37 | 0.22 | 0.17 | -    | 0.31 |
| $\text{N-Z8C}$                         | 88.14               | 7.67  | 3.36 | -    | 0.83 | -    | -    |

**Table S3.** List of outstanding metal nitrides-based ORR catalysts in acidic and alkaline media.

| Catalyst                                                  | Electrolyte                          | Half-wave potential (V vs. RHE) | Reference |
|-----------------------------------------------------------|--------------------------------------|---------------------------------|-----------|
| Ti <sub>0.8</sub> Co <sub>0.2</sub> N assemblies          | 0.1 M HClO <sub>4</sub>              | 0.79                            | [1]       |
| Cr <sub>10</sub> Fe <sub>2</sub> /Z8C                     | 0.1 M HClO <sub>4</sub>              | 0.768                           | This work |
| Cr <sub>10</sub> Co <sub>2</sub> /Z8C                     | 0.1 M HClO <sub>4</sub>              | 0.738                           | This work |
| Cr/Z8C                                                    | 0.1 M HClO <sub>4</sub>              | 0.722                           | This work |
| Ti <sub>0.95</sub> Ni <sub>0.05</sub> N                   | 0.1 M HClO <sub>4</sub>              | 0.70                            | [2]       |
| Co <sub>0.5</sub> Mo <sub>0.5</sub> N <sub>y</sub> /NCNCs | 0.5 M H <sub>2</sub> SO <sub>4</sub> | 0.58                            | [3]       |
| TiON                                                      | 0.5 M H <sub>2</sub> SO <sub>4</sub> | 0.58                            | [4]       |
| Co <sub>0.6</sub> Mo <sub>1.4</sub> N <sub>2</sub>        | 0.1 M HClO <sub>4</sub>              | 0.5                             | [5]       |
| Cr <sub>10</sub> Fe <sub>2</sub> /Z8C                     | 0.1 M KOH                            | 0.901                           | This work |
| Cr <sub>10</sub> Co <sub>2</sub> /Z8C                     | 0.1 M KOH                            | 0.851                           | This work |
| Ti <sub>0.8</sub> Co <sub>0.2</sub> N assemblies          | 0.1 M KOH                            | 0.85                            | [1]       |
| Ti <sub>0.95</sub> Ni <sub>0.05</sub> N                   | 0.1 M KOH                            | 0.80                            | [2]       |
| V <sub>0.95</sub> Co <sub>0.05</sub> N MFs                | 0.1 M KOH                            | 0.80                            | [6]       |
| Cr/Z8C                                                    | 0.1 M KOH                            | 0.797                           | This work |
| V <sub>0.95</sub> Co <sub>0.05</sub> N                    | 0.1 M KOH                            | 0.76                            | [7]       |
| CoMoON                                                    | 0.1 M KOH                            | 0.76                            | [8]       |

## References

- [1] X.L. Tian, L. Wang, B. Chi, Y. Xu, S. Zaman, K. Qi, H. Liu, S. Liao, B.Y. Xia, Formation of a Tubular Assembly by Ultrathin Ti<sub>0.8</sub>Co<sub>0.2</sub>N Nanosheets as Efficient Oxygen Reduction Electrocatalysts for Hydrogen–Metal–Air Fuel Cells, *Acs Catal*, (2018) 8970–8975.
- [2] X.L. Tian, J.M. Luo, H.X. Nan, Z.Y. Fu, J.H. Zeng, S.J. Liao, Binary transition metal nitrides with enhanced activity and durability for the oxygen reduction reaction, *J Mater Chem A*, 3 (2015) 16801–16809.
- [3] T. Sun, Q. Wu, R.C. Che, Y.F. Bu, Y.F. Jiang, Y. Li, L.J. Yang, X.Z. Wang, Z. Hu, Alloyed Co-Mo Nitride as High-Performance Electrocatalyst for Oxygen Reduction in Acidic Medium, *Acs Catal*, 5 (2015) 1857–1862.
- [4] M. Chisaka, Y. Ando, N. Itagaki, Activity and durability of the oxygen reduction reaction in a nitrogen-doped rutile-shell on TiN-core nanocatalysts synthesised via solution-phase combustion, *J Mater Chem A*, 4 (2016) 2501–2508.
- [5] B.F. Cao, J.C. Neuefeind, R.R. Adzic, P.G. Khalifah, Molybdenum Nitrides as Oxygen Reduction

Reaction Catalysts: Structural and Electrochemical Studies, *Inorg Chem*, 54 (2015) 2128-2136.

[6] H.B. Tang, J.M. Luo, X.L. Tian, Y.Y. Dong, J. Li, M.R. Liu, L.N. Liu, H.Y. Song, S.J. Liao, Template-Free Preparation of 3D Porous Co-Doped VN Nanosheet-Assembled Microflowers with Enhanced Oxygen Reduction Activity, *Acs Appl Mater Inter*, 10 (2018) 11604-11612.

[7] J.M. Luo, X.L. Tian, J.H. Zeng, Y.W. Li, H.Y. Song, S.J. Liao, Limitations and Improvement Strategies for Early-Transition-Metal Nitrides as Competitive Catalysts toward the Oxygen Reduction Reaction, *Acs Catal*, 6 (2016) 6165-6174.

[8] B.F. Cao, G.M. Veith, R.E. Diaz, J. Liu, E.A. Stach, R.R. Adzic, P.G. Khalifah, Cobalt Molybdenum Oxynitrides: Synthesis, Structural Characterization, and Catalytic Activity for the Oxygen Reduction Reaction, *Angew Chem Int Edit*, 52 (2013) 10753-10757.
